# Supplementary material for: Accurate Traceability of Stable C, H, O, N Isotope Ratios and Multi-Element Analysis Combined with Chemometrics for Chrysanthemi Flos ‘Hangbaiju’ from Different Origins
Source: MDPI journal article supplement (doi:10.3390/chemosensors10120529), 2022-12-12
Supplement: s1 [file s1]

Table S1 Information table of standard measurements and standard values of stable isotopes

| Stable<br>isotope<br>ratio           | Standard | Measured value |         |         |         |         |         |         |         |         |         | Mean    | SD   | Certified<br>values |
|--------------------------------------|----------|----------------|---------|---------|---------|---------|---------|---------|---------|---------|---------|---------|------|---------------------|
|                                      |          | 1              | 2       | 3       | 4       | 5       | 6       | 7       | 8       | 9       | 10      |         |      |                     |
| $\delta^{15}\text{N}_{\text{air}}$   | USGS61   | -2.80          | -2.78   | -2.86   | -2.84   | -2.79   | -2.91   | -2.88   | -2.87   | -2.90   | -2.77   | -2.84   | 0.05 | -2.87               |
|                                      | USGS61   | -34.98         | -34.97  | -34.95  | -35.03  | -34.95  | -35.02  | -34.98  | -35.01  | -35.01  | -35.00  | -34.99  | 0.03 | -35.05              |
|                                      | USGS43   | -196.25        | -195.72 | -196.59 | -196.86 | -194.68 | -199.75 | -199.51 | -195.15 | -195.86 | -195.02 | -196.54 | 1.77 | -50.30              |
| $\delta^2\text{H}_{\text{VSMOW}}$    | USGS54   | -259.30        | -257.02 | -261.86 | -258.00 | -259.66 | -256.97 | -260.04 | -256.18 | -258.32 | -262.07 | -258.94 | 2.02 | -150.40             |
|                                      | USGS56   | -198.62        | -196.85 | -192.55 | -194.82 | -193.67 | -200.96 | -195.96 | -194.78 | -195.73 | -196.09 | -196.00 | 2.41 | -44.00              |
|                                      | USGS43   | 17.58          | 16.54   | 16.89   | 16.79   | 17.28   | 17.12   | 17.55   | 16.01   | 17.05   | 16.36   | 16.92   | 0.51 | 14.11               |
| $\delta^{18}\text{O}_{\text{VSMOW}}$ | USGS54   | 23.00          | 23.20   | 22.22   | 22.57   | 22.36   | 22.60   | 22.75   | 22.79   | 22.37   | 22.69   | 22.66   | 0.30 | 17.79               |
|                                      | USGS56   | 30.21          | 30.05   | 31.01   | 30.72   | 30.36   | 31.32   | 31.73   | 30.81   | 30.82   | 30.91   | 30.79   | 0.51 | 27.23               |

Table S2 Methodological validation details

| Method  | Determination<br>of elements | (GSB-30a)<br>Certified<br>value | (GSB-30a)<br>Measured<br>value | Recovery<br>(%) | RSD<br>(%) | Correlation<br>coefficient<br>R2 | LOD    | LOQ    |
|---------|------------------------------|---------------------------------|--------------------------------|-----------------|------------|----------------------------------|--------|--------|
| ICP-MS  | Li                           | 0.20±0.03                       | 0.198±0.024                    | 98.9±12.2       | 7.76       | 0.9997                           | 0.001  | 0.004  |
|         | Be                           | 12±2                            | 10.7±0.7                       | 89.1±5.42       | 3.65       | 0.9996                           | 0.5    | 2.0    |
|         | Ga                           | Scalar,<br>12.5ng               | 12.3±0.3                       | 98.4±2.4        | 1.82       | 0.9999                           | 0.004  | 0.016  |
|         | Ge                           | 7.5±1.6                         | 6.56±0.44                      | 87.5±5.87       | 4.13       | 0.9996                           | 1.0    | 4.0    |
|         | Rb                           | 81±6                            | 81.3±4.8                       | 100±5.93        | 3.22       | 0.9997                           | 0.001  | 0.004  |
|         | Nb                           | (0.15)                          | 0.12±0.014                     | 82.4±9.29       | 6.97       | 0.9997                           | 0.004  | 0.016  |
|         | Cs                           | 0.42±0.05                       | 0.43±0.03                      | 103±6.95        | 3.51       | 0.9999                           | 0.001  | 0.004  |
|         | Th                           | 25±8                            | 22.0±4.8                       | 87.8±19         | 14.1       | 0.9998                           | 0.001  | 0.004  |
|         | Sc                           | 54±10                           | 51.1±7.1                       | 94.6±13.1       | 8.36       | 0.9997                           | 0.6    | 2.4    |
|         | Y                            | 0.51±0.05                       | 0.5±0.034                      | 98.8±6.70       | 4.58       | 0.9997                           | 0.0003 | 0.0012 |
|         | La                           | 0.34±0.04                       | 0.34±0.04                      | 98.9±10.3       | 6.33       | 0.9998                           | 0.0004 | 0.0016 |
|         | Ce                           | 0.51±0.07                       | 0.51±0.06                      | 99.9±11.3       | 6.20       | 0.9997                           | 0.0003 | 0.0012 |
|         | Pr                           | 64±7                            | 63.3±5.3                       | 98.9±8.28       | 6.65       | 0.9998                           | 0.2    | 0.8    |
|         | Nd                           | 0.25±0.04                       | 0.245±0.031                    | 97.9±12.3       | 7.08       | 0.9999                           | 0.0002 | 0.0008 |
| ICP-MS  | Sm                           | 54±6                            | 53.3±4.9                       | 98.7±9.01       | 6.36       | 1.0000                           | 0.2    | 0.8    |
|         | Eu                           | 20±4                            | 20.9±2.3                       | 104±11.4        | 6.28       | 0.9999                           | 0.06   | 0.24   |
|         | Gd                           | 58±7                            | 55.9±4.8                       | 96.3±8.32       | 5.24       | 0.9997                           | 0.1    | 0.4    |
|         | Tb                           | 9±1                             | 8.9±0.87                       | 99.2±9.64       | 7.98       | 0.9997                           | 0.06   | 0.24   |
|         | Dy                           | 54±8                            | 52±5.5                         | 96.4±10.2       | 8.23       | 0.9998                           | 0.08   | 0.32   |
|         | Ho                           | 11±2                            | 11.4±1.6                       | 103±14.2        | 9.66       | 0.9996                           | 0.03   | 0.12   |
|         | Er                           | 33±5                            | 31.9±3.7                       | 96.7±11.2       | 8.63       | 0.9997                           | 0.06   | 0.24   |
|         | Tm                           | 5.4±0.9                         | 5.42±0.74                      | 100±13.8        | 10.4       | 0.9997                           | 0.03   | 0.12   |
|         | Yb                           | 36±5                            | 34.4±3.2                       | 95.6±8.93       | 6.42       | 0.9999                           | 0.06   | 0.24   |
|         | Lu                           | 6±1                             | 5.6±0.6                        | 94.3±10.4       | 8.44       | 1.0000                           | 0.03   | 0.12   |
|         | V                            | 0.26±0.03                       | 0.26±0.026                     | 99.8±9.89       | 5.11       | 0.9997                           | 0.002  | 0.008  |
|         | Cr                           | 0.6±0.1                         | 0.55±0.04                      | 91.2±6.77       | 3.59       | 0.9998                           | 0.05   | 0.2    |
|         | Co                           | 0.23±0.02                       | 0.23±0.02                      | 99.6±7.83       | 3.86       | 1.0000                           | 0.001  | 0.004  |
|         | Ni                           | 4.4±0.3                         | 4.2±0.15                       | 95.8±3.45       | 2.14       | 0.9998                           | 0.2    | 0.8    |
| ICP-MS  | Cu                           | 13.2±0.9                        | 12.9±0.6                       | 97.7±4.27       | 3.02       | 1.0000                           | 0.05   | 0.20   |
|         | Zn                           | 26±3                            | 24.7±1.7                       | 95.0±6.50       | 3.01       | 0.9999                           | 0.5    | 2.0    |
|         | Sr                           | 14.0±1.3                        | 14.5±0.7                       | 103±5.07        | 2.79       | 0.9997                           | 0.2    | 0.8    |
|         | Cd                           | 0.2±0.02                        | 0.21±0.01                      | 104±4.67        | 3.00       | 0.9999                           | 0.002  | 0.008  |
|         | Ba                           | 32±3                            | 33.5±1.4                       | 105±4.25        | 2.45       | 0.9998                           | 0.02   | 0.08   |
|         | Tl                           | 0.057±0.011                     | 0.057±0.005                    | 100±9.30        | 6.96       | 0.9998                           | 0.0001 | 0.0004 |
| ICP-OES | Mo                           | 0.053±0.012                     | 0.054±0.008                    | 102±15.6        | 8.12       | 0.9999                           | 0.01   | 0.04   |
|         | Al                           | 1200±200                        | 1052±49                        | 87.7±4.04       | 2.91       | 0.9998                           | 0.5    | 2.0    |
|         | Ca                           | 3450±250                        | 3507±135                       | 102±3.92        | 1.76       | 0.9999                           | 5.0    | 20.0   |

|     |    |           |             |           |      |        |       |       |
|-----|----|-----------|-------------|-----------|------|--------|-------|-------|
|     | Fe | 161±18    | 157±14      | 97.4±8.55 | 5.31 | 0.9999 | 1.0   | 4.0   |
|     | K  | 13100±500 | 12941±339   | 98.8±2.59 | 2.10 | 0.9996 | 7.0   | 28.0  |
|     | Mg | 1500±50   | 1496±40     | 99.7±2.68 | 1.56 | 0.9999 | 5.0   | 20.0  |
|     | Mn | 1170±40   | 1172±34     | 100±2.92  | 1.73 | 0.9998 | 0.10  | 0.40  |
|     | Na | 15±4      | 15.7±2.5    | 105±16.5  | 10.5 | 0.9998 | 3.0   | 12.0  |
| AFS | As | 0.16±0.02 | 0.161±0.018 | 101±11.3  | 7.22 | 1.0000 | 0.01  | 0.04  |
|     | Se | 0.09±0.03 | 0.083±0.003 | 92.2±3.33 | 3.74 | 1.0000 | 0.002 | 0.008 |

---

Table S3 Working parameters of ICP-MS

| Parameter                     | Value           |
|-------------------------------|-----------------|
| High frequency transmit power | 1350 W          |
| Plasma gas (Ar) flow rate     | 13.0 L/min      |
| Auxiliary gas (Ar) flow       | 0.75 L/min      |
| Atomizing gas flow rate       | 1.0 L/min       |
| Sampling cone aperture        | 1.0 mm          |
| Intercept the cone aperture   | 0.7 mm          |
| Jump peak                     | 3 Point/quality |
| Residence time                | 10 ms/point     |
| Number of scanning            | 40              |
| Measuring time                | 35              |

Table S4 Reference working conditions of ICP-OES

| Parameter               | Value                       |
|-------------------------|-----------------------------|
| High frequency power    | 1.15 kW                     |
| Plasma gas flow rate    | 15L/min                     |
| Auxiliary gas flow rate | 0.5L/min                    |
| Atomizing gas pressure  | 0.22 MPa                    |
| Peristaltic pump speed  | 100 rpm                     |
| Observed altitude       | 15 mm                       |
| Integration time        | Long wave > 275 nm    15 s  |
|                         | Short wave < 275 nm    25 s |

Table S5 As working parameters measured by AFS

| Parameter              | Value       |
|------------------------|-------------|
| Negative pressure PMT  | 254 V       |
| Lamp current           | 27 mA       |
| Reading way            | Peak area   |
| Heating temperature    | 200 °C      |
| Atomizer height        | 8 mm        |
| Carrier gas flow rate  | 400 mL/min  |
| Shielded gas flow rate | 1000 mL/min |
| Method of measurement  | Std.curve   |
| Reading time           | 11 s        |
| Delay time             | 1 s         |

Table S6 Se working parameters measured by AFS

| Parameter              | Value      |
|------------------------|------------|
| Negative pressure PMT  | 291 V      |
| Lamp current           | 83 mA      |
| Reading way            | Peak area  |
| Heating temperature    | 200 °C     |
| Atomizer height        | 8 mm       |
| Carrier gas flow rate  | 300 mL/min |
| Shielded gas flow rate | 800 mL/min |
| Method of measurement  | Std.curve  |
| Reading time           | 11 s       |
| Delay time             | 1 s        |
